# Supplementary material for: Cost-effective generation of precise label-free quantitative proteomes in high-throughput by microLC and data-independent acquisition
Source: PubMed Central journal article supplement (PMC5847575; doi:10.1038/s41598-018-22610-4), 2018-03-12
Supplement: 41598_2018_22610_MOESM1_ESM.pdf [file 41598_2018_22610_MOESM1_ESM.pdf]

## Cost-effective generation of precise label-free quantitative proteomes in high-throughput by microLC and data-independent acquisition

Jakob Vowinckel<sup>1,3\*</sup>, Aleksej Zelezniak<sup>1,4\*</sup>, Roland Bruderer<sup>3</sup>, Michael Mülleder<sup>1,2</sup> Lukas Reiter<sup>3</sup>, and Markus Ralser<sup>1,2+</sup>

<sup>1</sup> Department of Biochemistry and Cambridge Systems Biology Centre, University of Cambridge, 80 Tennis Court Rd, Cambridge CB2 1GA, UK

<sup>2</sup> The Molecular Biology of Metabolism Laboratory, The Francis Crick Institute, 1 Midland Rd, London NW1 1AT, UK

<sup>3</sup> Biognosys AG, Wagistrasse 21, CH-8952 Schlieren, Switzerland

<sup>4</sup> Department of Biology and Biological Engineering, Chalmers University of Technology, Kemigården 10, SE-412 96, Göteborg, Sweden

+ To whom correspondence should be addressed. markus.ralser@crick.ac.uk, Tel +44 1223 761346

- These authors contributed equally to this work.

### Suppl. Fig. 1. Accumulation time in microLC-SWATH on a TripleTOF5600

Precursor and product intensities, exemplified by the yeast *SSB1* peptide SSNITISNAVGR, were determined at 3  $\mu$ l/min flow rate in SWATH acquisition. Accumulation times 40 - 75 ms do not have a significant impact on signal intensity of precursors (solid line) or products (shaded lines). Number of quantifiable proteins in microLC-MS is not reduced by accumulation time down to 40 ms (inset).

### Suppl. Fig. 2. Distribution of peptide precursors in the yeast proteome.

Precursors identified in the sample fractionation SWATH library approach were plotted according to their mass-to-charge ratio and coloured according to the number of amino acids. 26868 out of 32754 peptides (82 %) are between 400 and 850 m/z, while 31408 (96 %) are between 400 and 1250 m/z.

### Suppl. Fig. 3. Yeast protein quantification from microLC-SWATH using 29 x 16 m/z isolation windows.

A yeast tryptic digest was analysed using microLC (25 cm x 0.3 mm Triart-C18, 3  $\mu$ l/min, 60 min gradient) and coupled to a TripleTOF5600 MS operating in SWATH mode by repeated injection of 10  $\mu$ g yeast proteome

digest (9x). Isolation windows were chosen as 29x16 m/z, with 40 ms accumulation time and a mass range of 400-850 m/z.

Data was processed with Spectronaut v8.0 using SWATH libraries generated a) by sample fractionation (*frac*) or b) sample exhaustion (*exh*), c) using a publicly accessible spectral library (*Biognosys library*, Spectronaut repository), or with a library generated by DIA-Umpire. Library a) allowed quantification of 1422 proteins, while 1157 proteins could be quantified using library b). The public library (c) did quantify 1118, and DIA-Umpire, that uses correlation patterns to create a library directly out of the SWATH data, 890 proteins. Spectral libraries (except the one obtained from Spectronaut repository) were generated according to Schubert et al.<sup>1</sup>

**Suppl. Fig. 4. Yeast peptide quantification from microLC-SWATH using 34 x 25 m/z isolation windows.**

A yeast tryptic digest was analysed using microLC (25 cm x 0.3 mm Triart-C18, 3 µl/min, 60 min gradient) and coupled to a TripleTOF5600 MS operating in SWATH mode by repeated injection of 10 µg yeast proteome digest (9x). Isolation windows were chosen as 34x25 m/z, with 100 ms accumulation time and a mass range of 400-1250 m/z.

Data was processed with Spectronaut v8.0 using SWATH libraries generated a) by sample fractionation (*frac*) or b) sample exhaustion (*exh*), c) using a publicly accessible spectral library (*Biognosys library*, Spectronaut repository), or with a library generated by DIA-Umpire. Library a) allowed quantification of 8824 peptides, while 6866 peptides could be quantified using library b). The public library (c) did quantify 8283, and DIA-Umpire, that uses correlation patterns to create a library directly out of the SWATH data, 6132 peptides. Spectral libraries (except the one obtained from Spectronaut repository) were generated according to Schubert et al.<sup>1</sup>

**Suppl. Fig. 5. Yeast peptide quantification from microLC-SWATH using 29 x 16 m/z isolation windows.**

A yeast tryptic digest was analysed using microLC (25 cm x 0.3 mm Triart-C18, 3 µl/min, 60 min gradient) and coupled to a TripleTOF5600 MS operating in SWATH mode by repeated injection of 10 µg yeast proteome digest (9x). Isolation windows were chosen as 29x16 m/z, with 40 ms accumulation time and a mass range of 400-850 m/z.

Data was processed with Spectronaut v8.0 using SWATH libraries generated a) by sample fractionation (*frac*) or b) sample exhaustion (*exh*), c) using a publicly accessible spectral library (*Biognosys library*, Spectronaut repository), or with a library generated by DIA-Umpire. Library a) allowed quantification of 6598 peptides, while 5673 peptides could be quantified using library b). The public library (c) did quantify 6518, and DIA-Umpire, that uses correlation patterns to create a library directly out of the SWATH data, 4841 peptides. Spectral libraries (except the one obtained from Spectronaut repository) were generated according to Schubert et al.<sup>1</sup>

**Suppl. Fig. 6. Technical variability of yeast peptide quantification is low in microLC-SWATH-MS irrespective of data extraction**

Fold change variability of 765 peptide precursors present in all data sets was compared throughout nine replicates. Median coefficients of variation are between 7.3 % and 8.4 % for libraries generated using respectively fractionation and exhaustion approach, 8.8 % for an unrelated yeast library, and 7 % for a library generated by DIA-Umpire. Spectral libraries (except the one obtained from Spectronaut repository) were generated according to Schubert et al.<sup>1</sup>

**Suppl. Fig. 7. Human peptide quantification from microLC-SWATH data.**

A tryptic digest of a whole-cell protein extract from human K562 cells was analysed using microLC (25 cm x 0.3 mm Triart-C18, 3 µl/min, 60 min gradient) and coupled to a TripleTOF5600 MS operating in SWATH mode by repeated injection of 3 µg digest (6x). Data was processed with Spectronaut v8.0 using a SWATH library obtained from the SWATHAtlas repository<sup>2</sup> (*10k library*), or using SWATH libraries generated by repeated analysis of HEK293 or HeLa cell extracts (Spectronaut repository). Data analysis using a rich library allows quantification of 20508 peptides, while 9256 peptides can be quantified using a HEK293 and 12272 using a HeLa library, respectively.

**Suppl. Fig. 8. Technical variability of human peptide quantification is low in microLC-SWATH-MS irrespective of data extraction**

Fold change variability of 6722 peptide precursors present in all data sets compared throughout the nine replicates. Median coefficients of variation of signal intensities are between 5.8 and 6.5 %, for all libraries.

**Suppl. Fig. 9. Direct correlation of peptide intensities between two human samples reveals no negative bias towards low intensity peptides**

Correlation of peptide intensities of two human samples is linear ( $R^2 = 0.98$ ), and correlation is equally good for high and low intensity peptides over five orders of magnitude.

**Suppl. Fig. 10. Coefficients of variation show little bias towards low intensity peptides**

Coefficients of variation of peptide intensities of six human samples is low (mean 3-10 %) for peptides with intensities >1000 cps, and only marginally elevated for lower peptides (mean 8-12 %). Inset: Coefficients of variation of peptide intensities of six human samples.

**Suppl. Fig. 11. Library size is associated to quantification precision.**

Protein identifications in a spectral library generated by sample fractionation (green; 3896 proteins) or using DIA-UMPIRE approach (violet; 853 proteins) were plotted against absolute protein abundances (log scale) reported by two independent datasets (Kulak et al. 2014<sup>3</sup>; Ghaemmaghami et al. 2003<sup>4</sup>). DIA-Umpire library indeed captures highly abundant proteins.

**Suppl. Fig. 12. Total precursor intensities before and after batch correction**

Combined intensities of all precursors varies with experimental batches, and is equalled out by batch correction.

**Suppl. Fig. 13. Protein fold change standard deviation is reduced by batch correction**

Protein fold change was calculated from three most abundant peptides of the representative ZRP1\_YEAST protein quantified in two yeast strains in 9

replicates (3 batches). After batch correction, variability is considerably reduced.

Suppl. Fig. 1

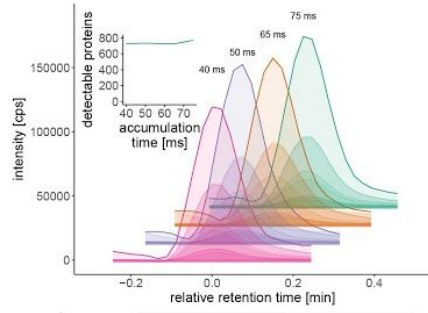

Suppl. Fig. 2

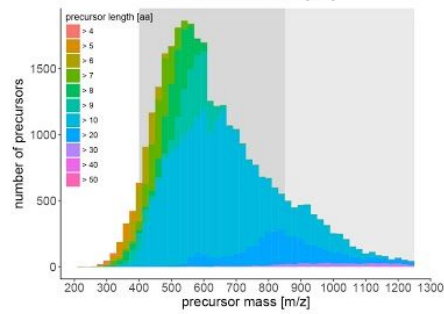

Suppl. Fig. 3

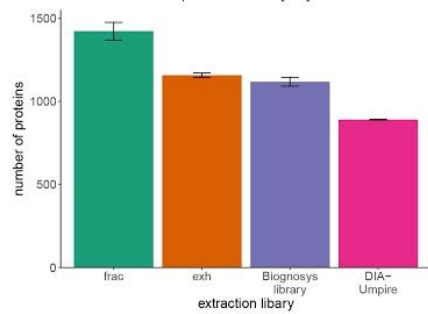

Suppl. Fig. 4

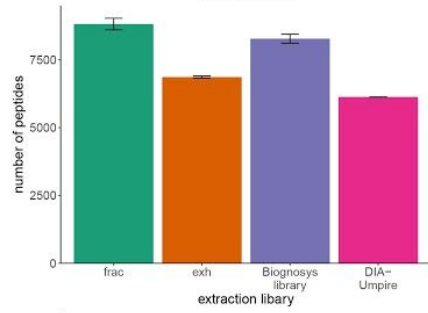

Suppl. Fig. 5

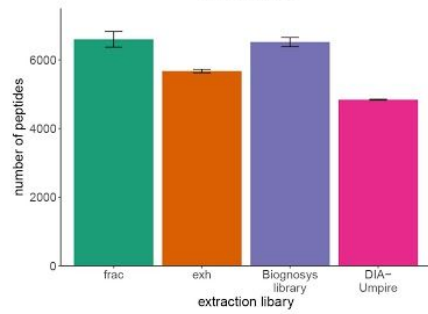

Suppl. Fig. 6

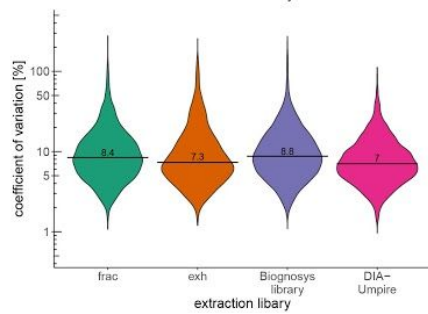

Suppl. Fig. 7

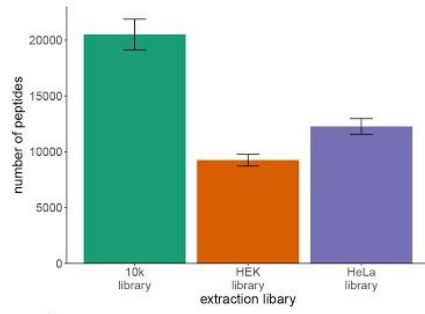

Suppl. Fig. 8

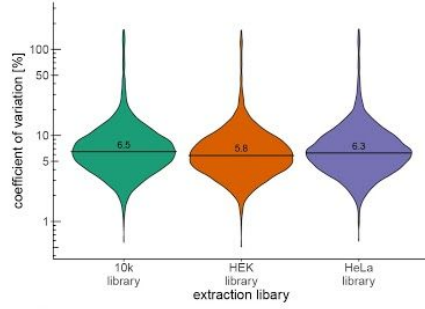

Suppl. Fig. 9

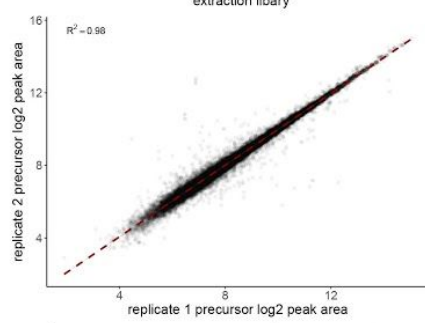

Suppl. Fig. 10

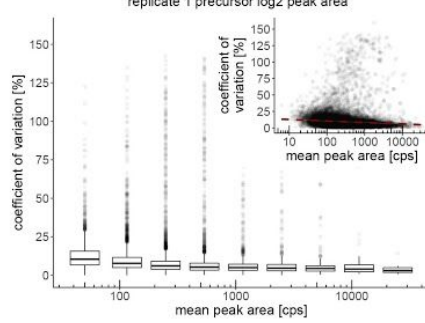

Suppl. Fig. 11

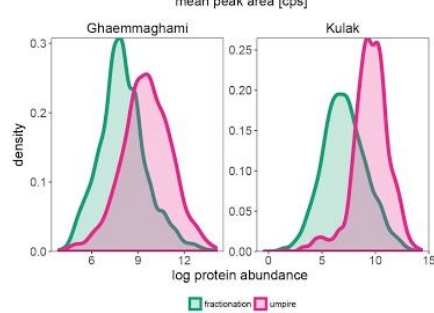

Suppl. Fig. 12

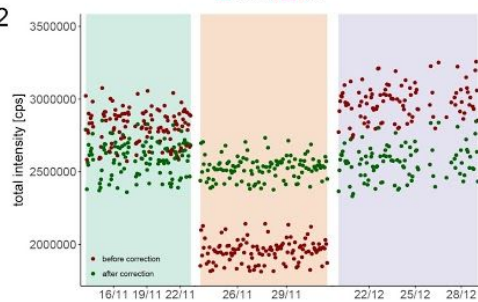

Suppl. Fig. 13

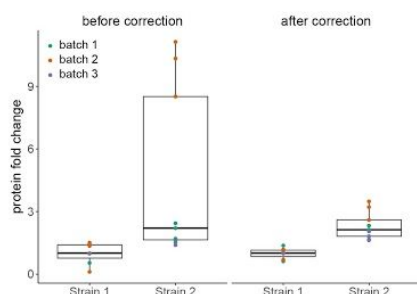

## Supplementary Tables

Suppl. table 1: Data sets included in this study

| Figure panel | Sample                  | Experiment                                                                                                                                                                                                                                                                               | Acquisition mode |
|--------------|-------------------------|------------------------------------------------------------------------------------------------------------------------------------------------------------------------------------------------------------------------------------------------------------------------------------------|------------------|
| A-D          | Yeast lysate            | Multiple chromatography regimes                                                                                                                                                                                                                                                          | DDA              |
| E            | Yeast lysate            | 60 min water to acetonitrile gradient at a flow-rate of 3 $\mu$ L/min, varying amounts of loaded protein                                                                                                                                                                                 | DDA              |
| F            | Yeast lysate            | 5 $\mu$ g yeast protein injected and separated using water-to-acetonitrile chromatographic gradients of 10-90 min at a flow-rate of 3 $\mu$ L/min                                                                                                                                        | DDA              |
| G            | Yeast lysate            | The sample first separated by high pH reverse phase chromatography on an analytical HPLC and then each fraction is analyzed with 3 $\mu$ L/min flow rate. In the sample exhaustion approach, the same digest was instead injected repeatedly until protein identification was saturated. | DDA              |
| H            | Yeast lysate            | SWATH using 34 x 25 m/z or 29 x 16 m/z windows at 3 $\mu$ L/min flowrate. Later used for acquisition of 397 yeast samples in ( <a href="#">Zelezniak et al, parallel submission</a> )                                                                                                    | DIA              |
| I            | Yeast lysate            | For fractionation and exhaustion library same samples as G. DIA-UMPIRE library created using data from 9 injections recorded with 34 x 25 m/z width SWATH windows                                                                                                                        | DDA/DIA          |
| J, L         | human K562 cells lysate | 6 injections, 3 $\mu$ L/min, 60 min gradient, 3 $\mu$ g tryptic digest with 34 x 25 m/z width SWATH windows, libraries from SWATHAtlas repository                                                                                                                                        | DIA              |
| K            | Yeast lysate            | 9 injections, 3 $\mu$ L/min, 60 min gradient recorded with 10 $\mu$ g tryptic digest 34 x 25 m/z width SWATH windows                                                                                                                                                                     | DIA              |

|     |              |                                                                                                                                                 |     |
|-----|--------------|-------------------------------------------------------------------------------------------------------------------------------------------------|-----|
| M-R | Yeast lysate | 296 proteomes, grown in 9 replicates (3 biological x 3 technical) recorded with 34 x 25 m/z width SWATH windows, 3 $\mu$ l/min, 60 min gradient | DIA |
|-----|--------------|-------------------------------------------------------------------------------------------------------------------------------------------------|-----|

**Suppl. table 2: Chromatographic gradients**

| Gradient      | min  | %A |
|---------------|------|----|
| <b>10 min</b> | 1    | 97 |
|               | 8.3  | 60 |
|               | 10   | 60 |
|               | 15   | 97 |
|               | 27   | 97 |
| <b>20 min</b> | 1    | 97 |
|               | 16.7 | 60 |
|               | 20   | 60 |
|               | 25   | 97 |
|               | 37   | 97 |
| <b>30 min</b> | 1    | 97 |
|               | 25   | 60 |
|               | 30   | 60 |
|               | 35   | 97 |
|               | 47   | 97 |
| <b>45 min</b> | 1    | 97 |
|               | 37.5 | 60 |
|               | 45   | 60 |
|               | 50   | 97 |
|               | 62   | 97 |
| <b>60 min</b> | 1    | 97 |
|               | 50   | 60 |
|               | 60   | 60 |
|               | 65   | 97 |
|               | 77   | 97 |
| <b>90 min</b> | 1    | 97 |
|               | 75   | 60 |
|               | 90   | 60 |
|               | 95   | 97 |
|               | 107  | 97 |



### Suppl. table 3: SWATH isolation windows

34x25 m/z regime

| Start | End  | Overlap | acc. time |
|-------|------|---------|-----------|
| 400   | 425  | 1       | 100       |
| 425   | 450  | 1       | 100       |
| 450   | 475  | 1       | 100       |
| 475   | 500  | 1       | 100       |
| 500   | 525  | 1       | 100       |
| 525   | 550  | 1       | 100       |
| 550   | 575  | 1       | 100       |
| 575   | 600  | 1       | 100       |
| 600   | 625  | 1       | 100       |
| 625   | 650  | 1       | 100       |
| 650   | 675  | 1       | 100       |
| 675   | 700  | 1       | 100       |
| 700   | 725  | 1       | 100       |
| 725   | 750  | 1       | 100       |
| 750   | 775  | 1       | 100       |
| 775   | 800  | 1       | 100       |
| 800   | 825  | 1       | 100       |
| 825   | 850  | 1       | 100       |
| 850   | 875  | 1       | 100       |
| 875   | 900  | 1       | 100       |
| 900   | 925  | 1       | 100       |
| 925   | 950  | 1       | 100       |
| 950   | 975  | 1       | 100       |
| 975   | 1000 | 1       | 100       |
| 1000  | 1025 | 1       | 100       |
| 1025  | 1050 | 1       | 100       |
| 1050  | 1075 | 1       | 100       |
| 1075  | 1100 | 1       | 100       |
| 1100  | 1125 | 1       | 100       |
| 1125  | 1150 | 1       | 100       |
| 1150  | 1175 | 1       | 100       |
| 1175  | 1200 | 1       | 100       |
| 1200  | 1225 | 1       | 100       |
| 1225  | 1250 | 1       | 100       |

29x16 m/z regime

| Start | End | Overlap | acc time |
|-------|-----|---------|----------|
| 400   | 416 | 1       | 40       |
| 416   | 432 | 1       | 40       |
| 432   | 448 | 1       | 40       |
| 448   | 464 | 1       | 40       |
| 464   | 480 | 1       | 40       |
| 480   | 496 | 1       | 40       |
| 496   | 512 | 1       | 40       |
| 512   | 528 | 1       | 40       |
| 528   | 544 | 1       | 40       |
| 544   | 560 | 1       | 40       |
| 560   | 576 | 1       | 40       |
| 576   | 592 | 1       | 40       |
| 592   | 608 | 1       | 40       |
| 608   | 624 | 1       | 40       |
| 624   | 640 | 1       | 40       |
| 640   | 656 | 1       | 40       |
| 656   | 672 | 1       | 40       |
| 672   | 688 | 1       | 40       |
| 688   | 704 | 1       | 40       |
| 704   | 720 | 1       | 40       |
| 720   | 736 | 1       | 40       |
| 736   | 752 | 1       | 40       |
| 752   | 768 | 1       | 40       |
| 768   | 784 | 1       | 40       |
| 784   | 800 | 1       | 40       |
| 800   | 816 | 1       | 40       |
| 816   | 832 | 1       | 40       |
| 832   | 848 | 1       | 40       |
| 848   | 850 | 1       | 40       |

- (1) Schubert, O. T.; Gillet, L. C.; Collins, B. C.; Navarro, P.; Rosenberger, G.; Wolski, W. E.; Lam, H.; Amodei, D.; Mallick, P.; MacLean, B.; Aebersold, R. *Nat. Protoc.* **2015**, *10* (3), 426–441.
- (2) Rosenberger, G.; Koh, C. C.; Guo, T.; Röst, H. L.; Kouvonen, P.; Collins, B. C.; Heusel, M.; Liu, Y.; Caron, E.; Vichalkovski, A.; Faini, M.; Schubert, O. T.; Faridi, P.; Ebhardt, H. A.; Matondo, M.; Lam, H.; Bader, S. L.; Campbell, D. S.; Deutsch, E. W.; Moritz, R. L.; Tate, S.; Aebersold, R. *Sci Data* **2014**, *1*, 140031.
- (3) Kulak, N. A.; Pichler, G.; Paron, I.; Nagaraj, N.; Mann, M. *Nat. Methods* **2014**, *11* (3), 319–324.
- (4) Ghaemmaghami, S.; Huh, W.-K.; Bower, K.; Howson, R. W.; Belle, A.; Dephoure, N.; O’Shea, E. K.; Weissman, J. S. *Nature* **2003**, *425* (6959), 737–741.
